# Supplementary material
Source: HighWire-hosted journal article supplement (http://ajnr-stage2.highwire.org/highwire/filestream/182832/field_highwire_adjunct_files/0/19-00213.pdf)
Supplement: 19-00213.pdf [file 19-00213.pdf]

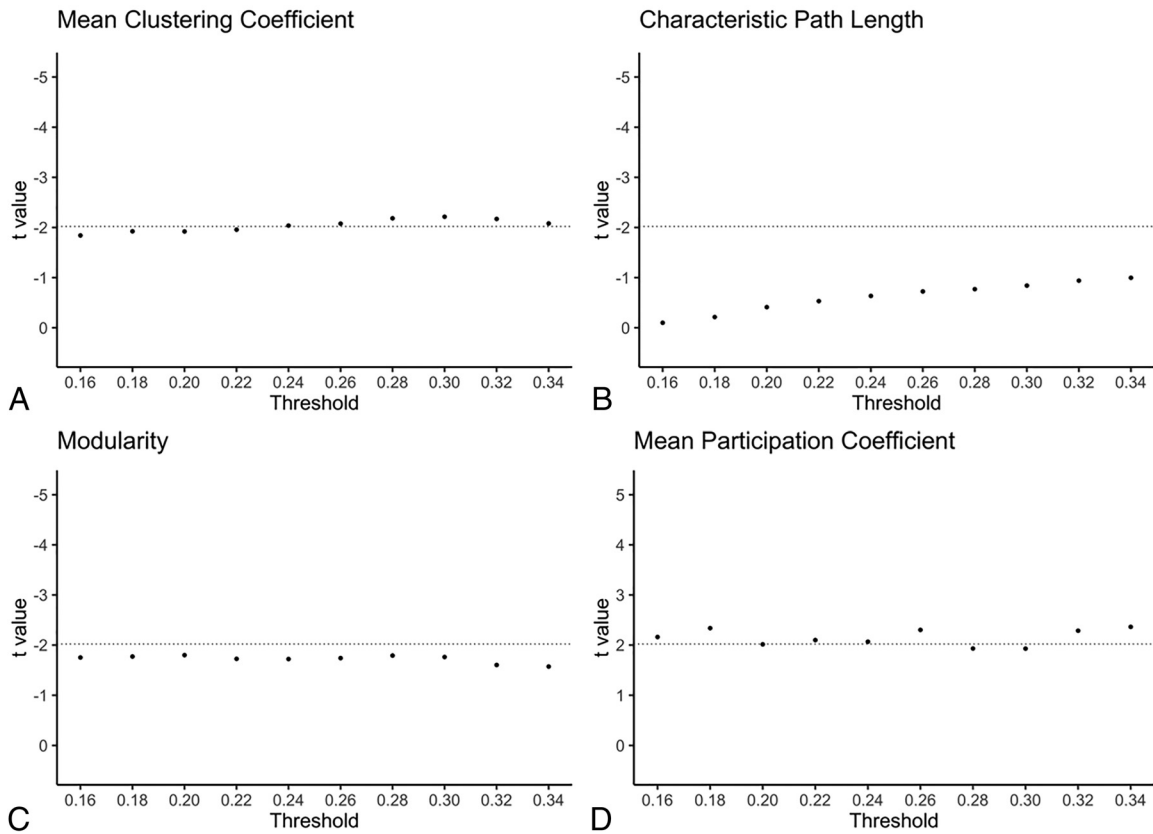

**ON-LINE FIG 1.** Associations between graph theory metrics and total Quality of Life in Childhood Epilepsy scores across network-generation thresholds. The  $t$  value of the specified predictor in the linear model (y-axis) is plotted by the network-generation threshold (x-axis). The dotted horizontal line indicates the  $t$  value over which the  $P$  value corresponds to a value of  $<.05$  ( $t = 2.02$ ). Models examined the relationship between total QOLCE score and the mean clustering coefficient (A), characteristic path length (B), modularity (C), and mean participation coefficient (D).

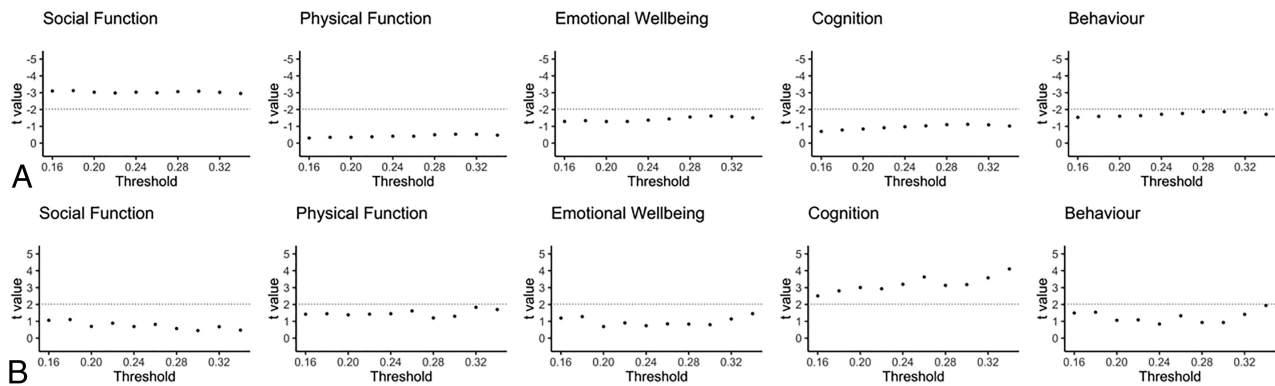

**ON-LINE FIG 2.** Associations between graph theory metrics and domain-specific Quality of Life in Childhood Epilepsy scores across network-generation thresholds. The  $t$  value of the specified predictor in the linear model ( $y$ -axis) is plotted by the network-generation threshold ( $x$ -axis). The dotted horizontal line indicates the  $t$  value over which the  $P$  value corresponds to a value of  $<0.05$  ( $t = 2.02$ ). Models examined the relationship between domain scores and the mean clustering coefficient (A), and mean participation coefficient (B).

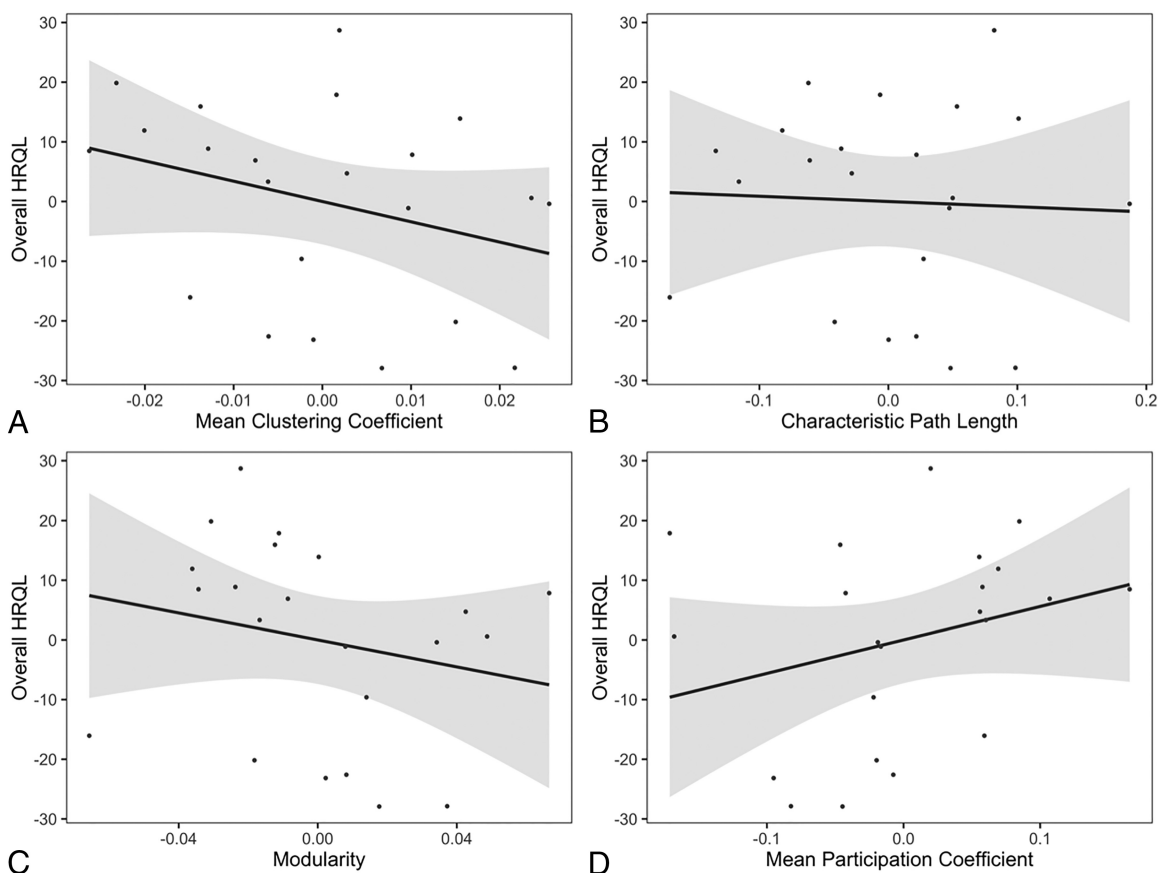

**ON-LINE FIG 3.** Associations between graph theory metrics and overall Quality of Life in Childhood Epilepsy scores in the subset of patients with frontal lobe epilepsy. None of mean clustering coefficient (A), characteristic path length (B), modularity (C) or mean participation coefficient (D) values are associated with total QOLCE score. Networks were thresholded at an absolute Pearson correlation coefficient of  $r = 0.34$ . Residuals after accounting for model covariates are plotted as relative measures along with regression lines with 95% confidence intervals.

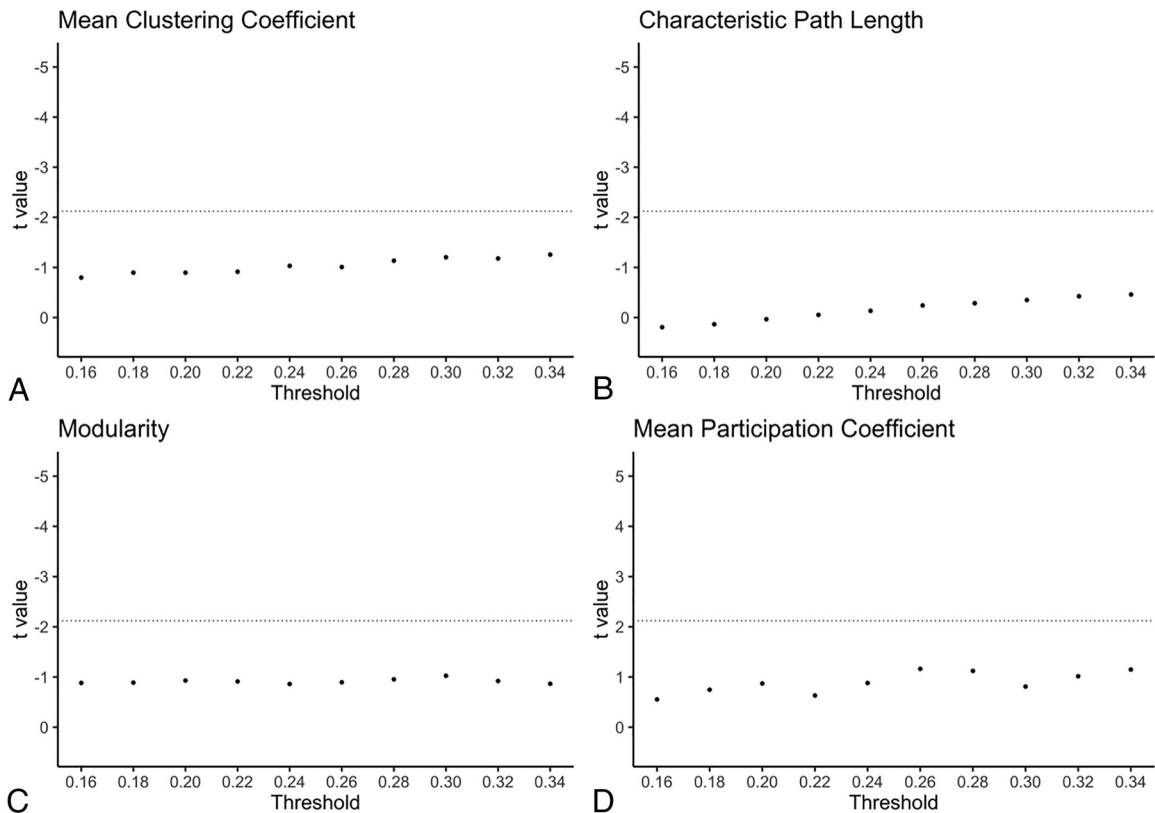

**ON-LINE FIG 4.** Associations between graph theory metrics and overall Quality of Life in Childhood Epilepsy scores across network-generation thresholds in the subset of patients with frontal lobe epilepsy. The  $t$  value of the specified predictor in the linear model ( $y$ -axis) is plotted by the network-generation threshold ( $x$ -axis). The dotted horizontal line indicates the  $t$  value over which the  $P$  value corresponds to a value of  $<.05$  ( $t = 2.12$ ). Models examined the relationship between total QOLCE score and the mean clustering coefficient (A), characteristic path length (B), modularity (C), and mean participation coefficient (D).

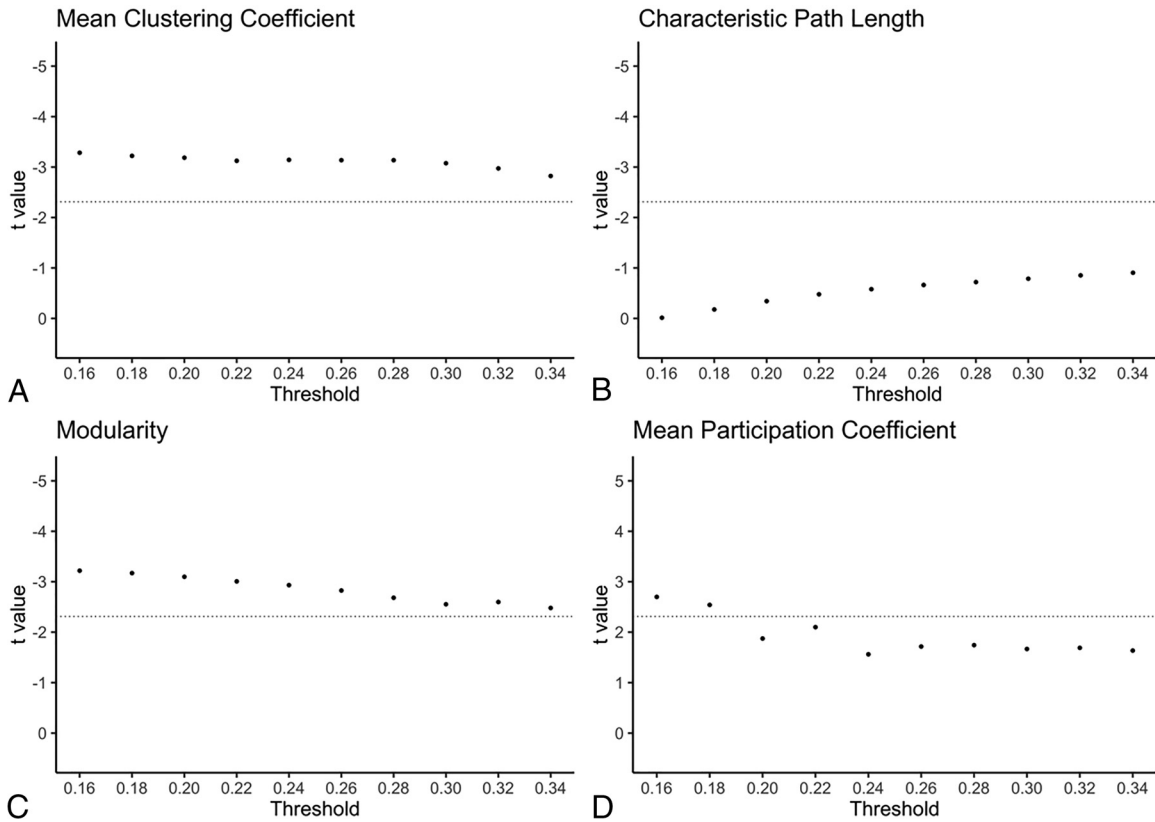

**ON-LINE FIG 5.** Associations between graph theory metrics and overall Quality of Life in Childhood Epilepsy scores across network-generation thresholds in the subset of patients with temporal lobe epilepsy. The  $t$  value of the specified predictor in the linear model ( $y$ -axis) is plotted by the network-generation threshold ( $x$ -axis). The dotted horizontal line indicates the  $t$  value over which the  $P$  value corresponds to a value of  $<.05$  ( $t = 2.31$ ). Models examined the relationship between total QOLCE score and the mean clustering coefficient (A), characteristic path length (B), modularity (C), and mean participation coefficient (D).

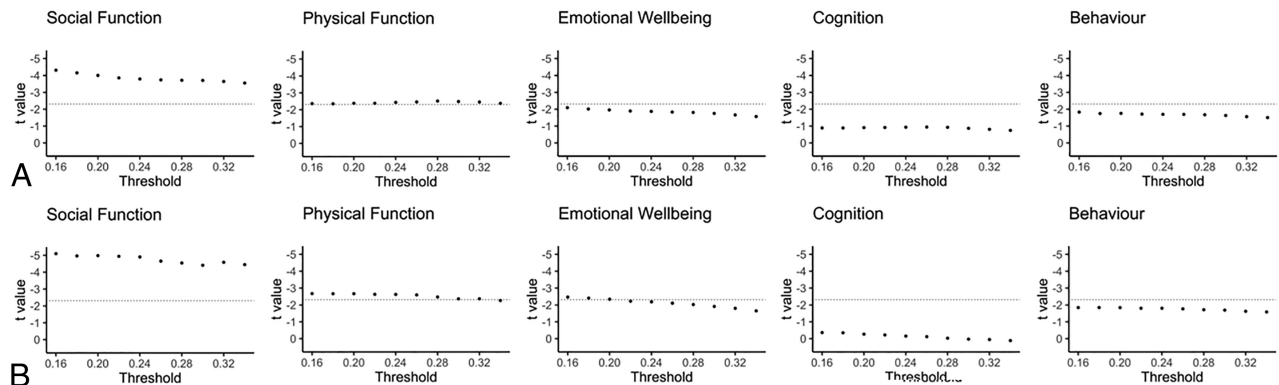

**ON-LINE FIG 6.** Associations between graph theory metrics and domain-specific Quality of Life in Childhood Epilepsy scores across network-generation thresholds in the subset of patients with temporal lobe epilepsy. The  $t$  value of the specified predictor in the linear model ( $y$ -axis) is plotted by the network-generation threshold ( $x$ -axis). The dotted horizontal line indicates the  $t$  value over which the  $P$  value corresponds to a value of  $<0.05$  ( $t = 2.31$ ). Models examined the relationship between domain scores and the mean clustering coefficient (A), and modularity (B).
